# Supplementary material for: Patterns of chromatin accessibility along the anterior-posterior axis in the early Drosophila embryo
Source: PLoS Genet. 2018 May 4;14(5):e1007367. doi: 10.1371/journal.pgen.1007367 (PMC5955596; doi:10.1371/journal.pgen.1007367)
Supplement: S2 Table — Cells A3 to D1l show the number of reads that were aligned by Bowtie2 (methods). B3 to B9 contain the total number of reads for each sample. C3 to C9 show the number of concordant read pairs that aligned. D3 to D11 shows the overall alignment rate (including multiple and discordant reads) to represent what percent of the sample came from our expected genome (Drosophila melanogaster). Rows 13 to 34 shows the read number changes after filtering out unmapped, not primary alignment, duplicates, failed platform checks, and improper pairs. Rows 23 to 31 show read numbers of each sample that are less than 130 bp. C14 to C34 shows the normalization factor used to normalize each sample to the number in column D (1 million reads for all replicate samples and 10 million reads for samples where the replicates are merged). (XLSX) [file pgen.1007367.s012.xlsx]

## Sheet: Sheet1
		Dm3
Sample	All reads	unique concordant read pairs	% Overall Alignment Rate (including multiple)
ME_JH_112315_1105-ATACSlice2-01-20a	36984564	7150892	92.69
ME_JH_112315_1105-ATACSlice2-02-20p	19383698	3825922	96.75
ME_JH_112315_1105-ATACSlice2-5-1A	38641395	11791951	91.54
ME_JH_112315_1105-ATACSlice2-6-1p	38796161	12329309	72.82
ME_JH_112315_1105-ATACSlice2-7-10whole	47244276	12744976	97.68
ME_JH_112315_1109-ATACSlice03-01-20Ant	50087614	16922406	95
ME_JH_112315_1109-ATACSlice03-02-20Post	34457240	4056100	38.15
ME_JH_112315_1109-ATACSlice03-03-1plus2	42215974	7688333	54.63
ME_JH_112315_1109-ATACSlice03-04-10whole	43706348	14554768	96.69
Normalization	Final Read pairs (filtered for quality score + dup removed)	Normalization Factor	Normalization Method
011617_081817_RemDUP_041217_Bowtie2_ME_JH_112315_1105-ATACSlice2-02-20p_shifted.bed	3491390	0.286419	1M D.mel Mapped reads
011617_081817_RemDUP_041217_Bowtie2_ME_JH_112315_1105-ATACSlice2-5-1A_shifted.bed	4042933	0.247345	1M D.mel Mapped reads
011617_081817_RemDUP_041217_Bowtie2_ME_JH_112315_1105-ATACSlice2-6-1p_shifted.bed	1015137	0.985089	1M D.mel Mapped reads
011617_081817_RemDUP_041217_Bowtie2_ME_JH_112315_1105-ATACSlice2-7-10whole_shifted.bed	9653037	0.103594	1M D.mel Mapped reads
011617_081817_RemDUP_041217_Bowtie2_ME_JH_112315_1109-ATACSlice03-01-20Ant_shifted.bed	15012534	0.066611	1M D.mel Mapped reads
011617_081817_RemDUP_041217_Bowtie2_ME_JH_112315_1109-ATACSlice03-02-20Post_shifted.bed	3214310	0.311109	1M D.mel Mapped reads
011617_081817_RemDUP_041217_Bowtie2_ME_JH_112315_1109-ATACSlice03-03-1plus2_shifted.bed	6400186	0.156245	1M D.mel Mapped reads
011617_081817_RemDUP_041217_Bowtie2_ME_JH_112315_1109-ATACSlice03-04-10whole_shifted.bed	12997325	0.0769389	1M D.mel Mapped reads
011617_101117_RemDUP_PE_041217_Bowtie2_ME_JH_112315_1105-ATACSlice2-01-20a_shifted.bed	5863659	0.170542	1M D.mel Mapped reads
011617_081817_RemDUP_041217_Bowtie2_ME_JH_112315_1105-ATACSlice2-02-20p_shifted_lessthan130.bed	1180552	0.847061	1M D.mel Mapped reads
011617_081817_RemDUP_041217_Bowtie2_ME_JH_112315_1105-ATACSlice2-5-1A_shifted_lessthan130.bed	1012989	0.987178	1M D.mel Mapped reads
011617_081817_RemDUP_041217_Bowtie2_ME_JH_112315_1105-ATACSlice2-6-1p_shifted_lessthan130.bed	273532	3.65588	1M D.mel Mapped reads
011617_081817_RemDUP_041217_Bowtie2_ME_JH_112315_1105-ATACSlice2-7-10whole_shifted_lessthan130.bed	2752608	0.363292	1M D.mel Mapped reads
011617_081817_RemDUP_041217_Bowtie2_ME_JH_112315_1109-ATACSlice03-01-20Ant_shifted_lessthan130.bed	5813225	0.172022	1M D.mel Mapped reads
011617_081817_RemDUP_041217_Bowtie2_ME_JH_112315_1109-ATACSlice03-02-20Post_shifted_lessthan130.bed	1085386	0.921331	1M D.mel Mapped reads
011617_081817_RemDUP_041217_Bowtie2_ME_JH_112315_1109-ATACSlice03-03-1plus2_shifted_lessthan130.bed	2233399	0.447748	1M D.mel Mapped reads
011617_081817_RemDUP_041217_Bowtie2_ME_JH_112315_1109-ATACSlice03-04-10whole_shifted_lessthan130.bed	3579281	0.279386	1M D.mel Mapped reads
011617_101117_RemDUP_PE_041217_Bowtie2_ME_JH_112315_1105-ATACSlice2-01-20a_shifted_lessthan130.bed	2098610	0.476506	1M D.mel Mapped reads
011718_MERGED_2reps_081817_RemDUP_041217_Bowtie2_ME_JH_112315_10whole_shifted_lessthan130.bed	6331889	1.57931	10M D.mel Mapped reads
011718_MERGED_2reps_081817_RemDUP_041217_Bowtie2_ME_JH_112315_20Ant_shifted_lessthan130.bed	7911835	1.26393	10M D.mel Mapped reads
011718_MERGED_2reps_081817_RemDUP_041217_Bowtie2_ME_JH_112315_20Post_shifted_lessthan130.bed	2265938	4.41318	10M D.mel Mapped reads
